# Supplementary material for: Volatile organic compounds as a potential screening tool for neoplasm of the digestive system: a meta-analysis
Source: PubMed Central journal article supplement (PMC8660806; doi:10.1038/s41598-021-02906-8), 2021-12-09

# Volatile organic compounds as a potential screening tool for neoplasm of the digestive system: A meta-analysis

Lixing Wang, MD<sup>1</sup>, Junan Li, MD<sup>2</sup>, Xiaoliang Xiong, MD<sup>1</sup>, Tingting Hao, MD<sup>1</sup>,  
Chao Zhang, MD<sup>1</sup>, Zhao Gao, MD<sup>1</sup>, Lili Zhong, PhD<sup>3#</sup>, Yinlong Zhao, PhD<sup>1#</sup>

1. Department of Nuclear Medicine, The Second Hospital of Jilin University, Changchun 130041, China
2. Gastroenterology and Center of Digestive Endoscopy, The Second Hospital of Jilin University, Changchun 130041, China
3. Jilin Provincial Key Laboratory on Molecular and Chemical Genetic, The Second Hospital of Jilin University, Changchun 130041, China

# The authors contributed equally to this work, and they are both the corresponding author.

Corresponding E-mail: yinlong@jlu.edu.cn

## STATA Operation Details

We used midas in STATA software to summarize data and output graphics.

1. Enter raw data (including author, year, tp, fp, tn, fn) in the Data Editor

|    | author                  | year | tp  | fp  | fn | tn  |
|----|-------------------------|------|-----|-----|----|-----|
| 1  | Altomare, D. F.         | 2013 | 32  | 7   | 5  | 34  |
| 2  | Arasaradnam, R. P.      | 2014 | 73  | 20  | 10 | 30  |
| 3  | de Meij, T. G.          | 2014 | 34  | 7   | 6  | 50  |
| 4  | Batty, C. A.            | 2015 | 24  | 9   | 7  | 22  |
| 5  | Kumar, S.               | 2015 | 33  | 13  | 0  | 100 |
| 6  | Shehata, A.             | 2015 | 5   | 2   | 2  | 17  |
| 7  | Bhatt, A.               | 2015 | 17  | 2   | 3  | 17  |
| 8  | Anai, H.                | 2016 | 17  | 2   | 3  | 34  |
| 9  | Shehata, N.             | 2016 | 35  | 3   | 5  | 126 |
| 10 | Arasaradnam, R. P.      | 2018 | 74  | 14  | 7  | 67  |
| 11 | Duran-Acevedo,          | 2018 | 14  | 1   | 0  | 14  |
| 12 | Markar, S. R.           | 2018 | 26  | 13  | 6  | 19  |
| 13 | Markar, S. R.*          | 2018 | 130 | 33  | 33 | 139 |
| 14 | Princivalle, A.         | 2018 | 65  | 16  | 0  | 86  |
| 15 | Widlak, M. M.           | 2018 | 22  | 86  | 13 | 147 |
| 16 | Bond, A.                | 2019 | 18  | 9   | 3  | 51  |
| 17 | Broza, Y. Y.            | 2019 | 3   | 153 | 0  | 570 |
| 18 | Markar, Sheraz R.       | 2019 | 21  | 8   | 4  | 46  |
| 19 | McFarlane, M.           | 2019 | 39  | 25  | 17 | 57  |
| 20 | Mozdjak, E.             | 2019 | 12  | 1   | 0  | 11  |
| 21 | Nissinen, S. I.         | 2019 | 54  | 11  | 14 | 41  |
| 22 | Altomare, D. F.         | 2020 | 74  | 6   | 8  | 81  |
| 23 | Miller-Atkins           | 2020 | 67  | 46  | 25 | 114 |
| 24 | van Keulen, K. E.       | 2020 | 16  | 4   | 13 | 23  |
| 25 | Navaneethan, Udayakumar | 2020 | 19  | 0   | 0  | 32  |
| 26 | Zonta, Giulia           | 2020 | 116 | 46  | 22 | 214 |
| 27 | Daulton, Emma           | 2021 | 38  | 2   | 7  | 31  |

## 2. Enter the code in the command.

Notes:

1. Unicode is supported; see [help unicode\\_advice](#).
2. Maximum number of variables is set to 5000; see [help set\\_maxvar](#).

running /Applications/Stata/ado/base/profile.do ...

.

---

Command

---

Properties

Variables

| Name | Label | Type | Format | Value label | Notes |
|------|-------|------|--------|-------------|-------|
|      |       |      |        |             |       |

Data

| Filename | Label | Notes | Variables | Observations | Size | Memory |
|----------|-------|-------|-----------|--------------|------|--------|
|          |       |       | 0         | 0            | 0    | 64M    |

/Users/wanglingxi/Downloads

## 3. Input “midas tp fp fn tn, id(author year) ms(0.75) ford fors bfor(dss)”, and get a forest plot of pooled sensitivity and specificity.

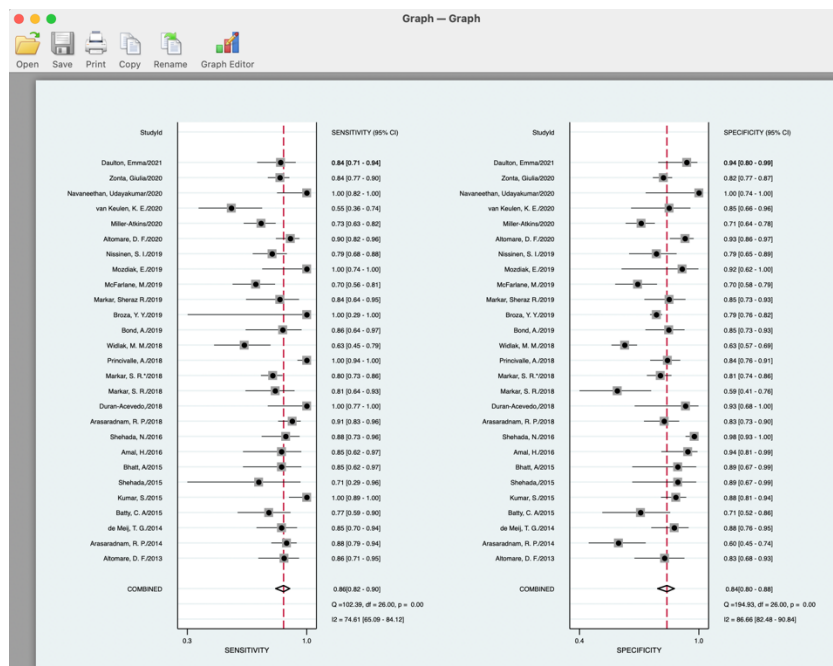

## 4. Input “midas tp fp fn tn, id(author year) ms(0.75) ford fors bfor(dss)”, and get the Summary ROC Curve.

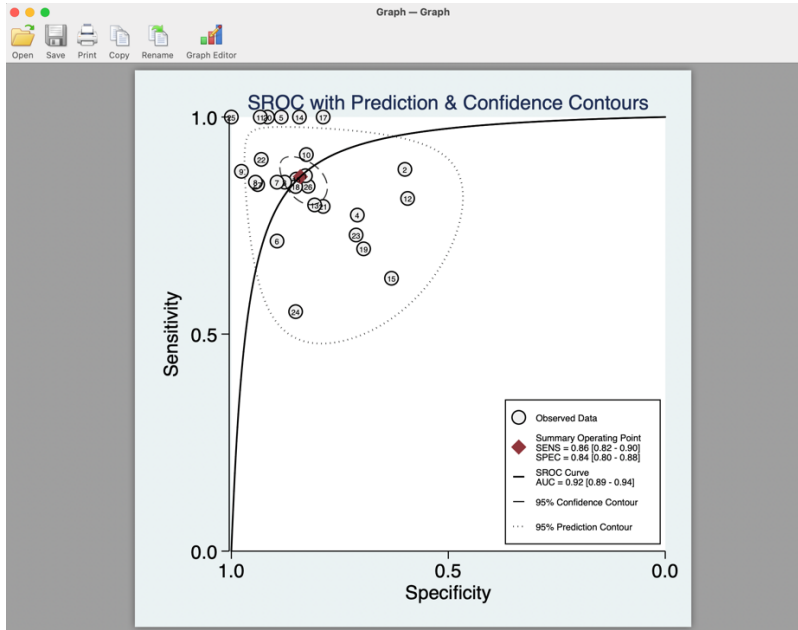

6. Input “midas tp fp fn tn, id(author year) ms(0.75) ford fors bfor(dlr)”, and get a forest plot of the pooled PLR and NLR.

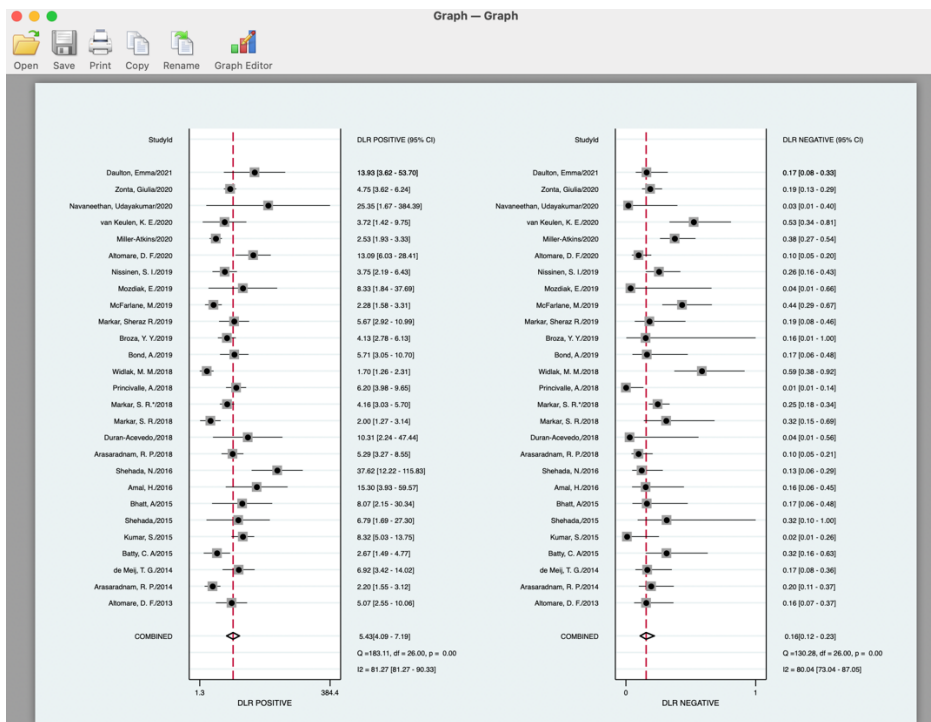

7. Input “midas tp fp fn tn, id(author year) ms(0.75) ford fors bfor(dlor)”, and get a forest plot of the pooled the pooled DOR.

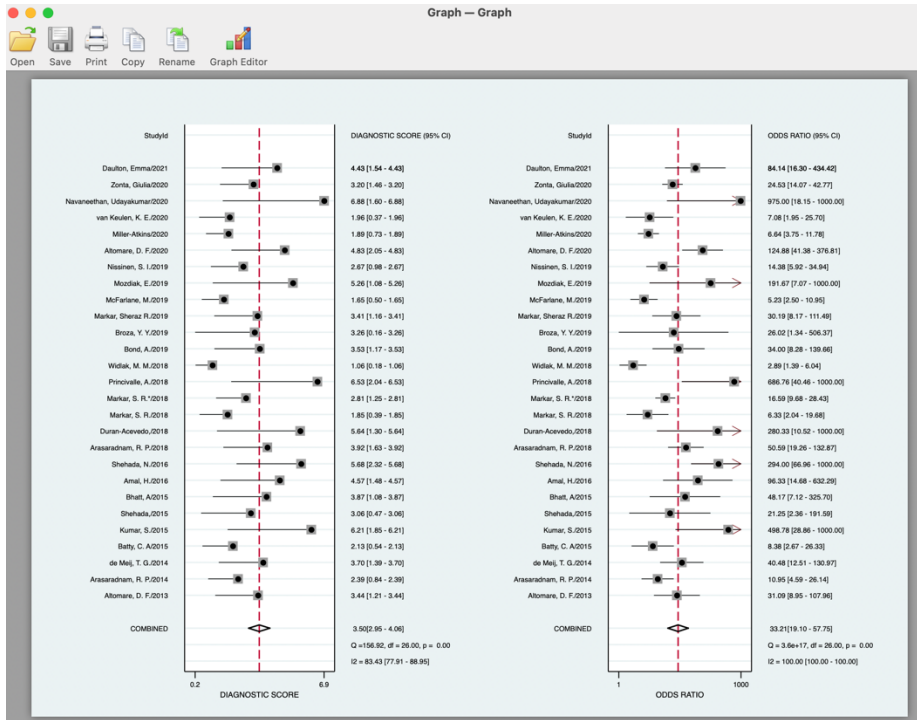

8. Input “midas tp fp fn tn, pubbias”, and get a Deeks’ Funnel Plot.

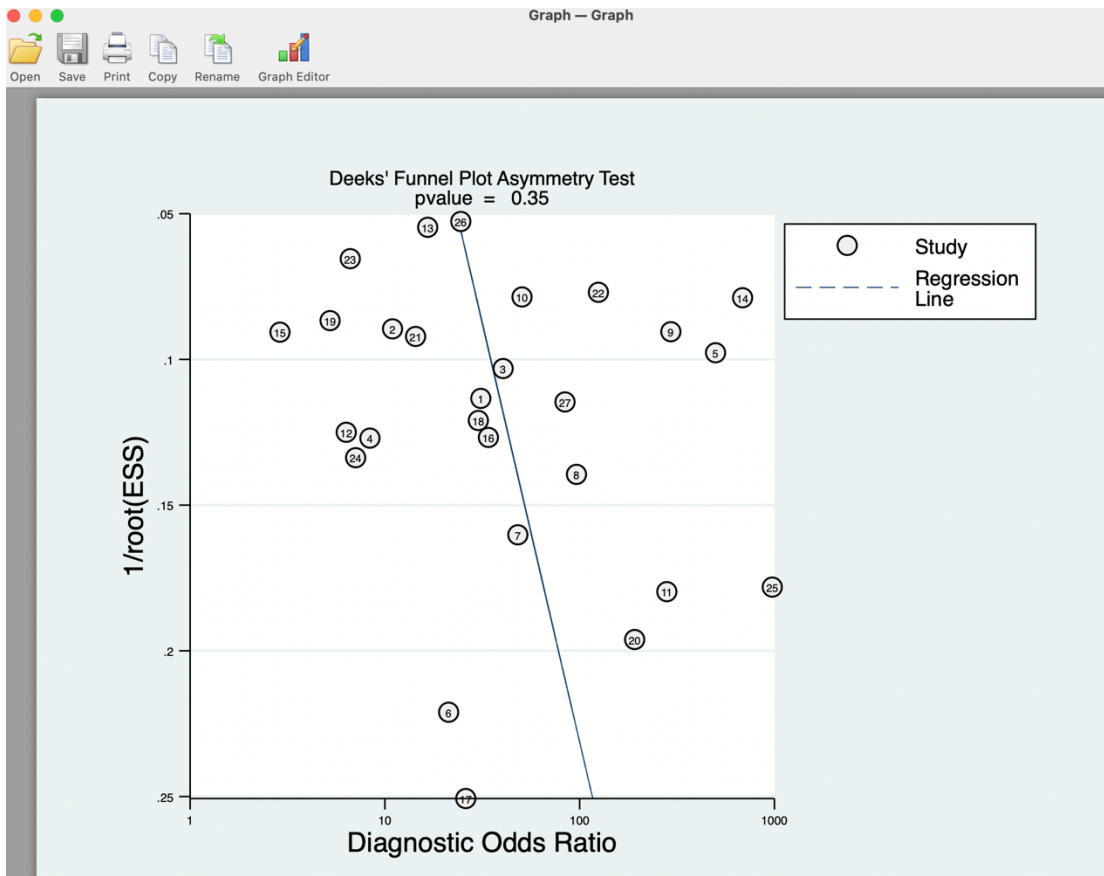

9. After assigning dichotomous variables to the data for meta-regression, Input “midas tp fp fn tn, reg(prodesign ssize30 fulverif testdescr refdescr subjdescr report brdspect blinded”, and get the forest plots of univariate meta-regression.

Univariable Meta-regression & Subgroup Analyses

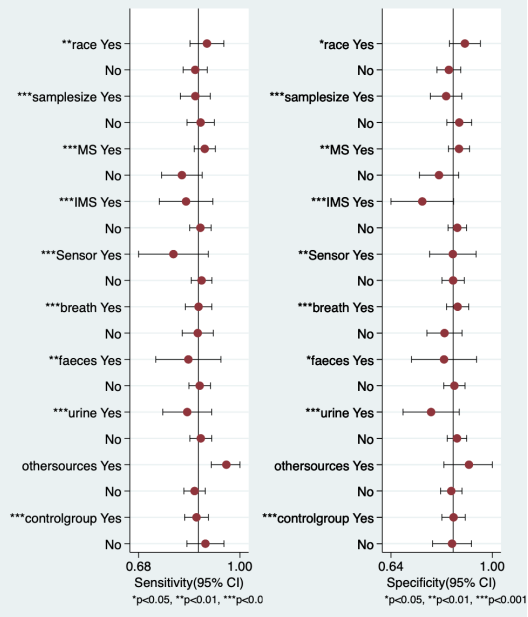

Supplement: 41598_2021_2906_MOESM1_ESM.pdf [file 41598_2021_2906_MOESM1_ESM.pdf]
